# Supplementary material for: Modification of the Textural Properties of Chitosan to Obtain Biochars for CO2-Capture Processes
Source: MDPI journal article supplement (doi:10.3390/polym14235240), 2022-12-01
Supplement: s1 [file s1]

## Supplementary information

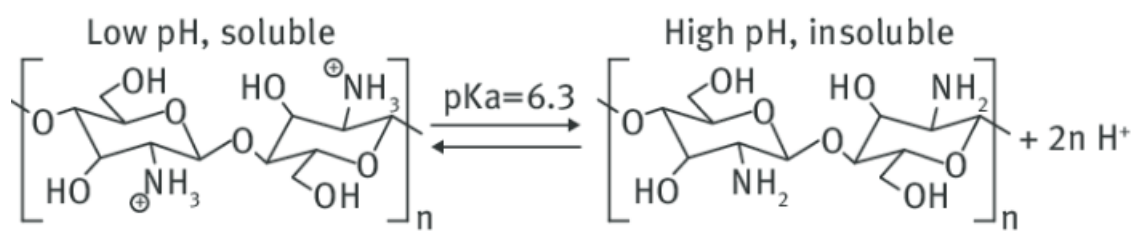

**Figure S1.** Scheme for the solutibization of chitosan.

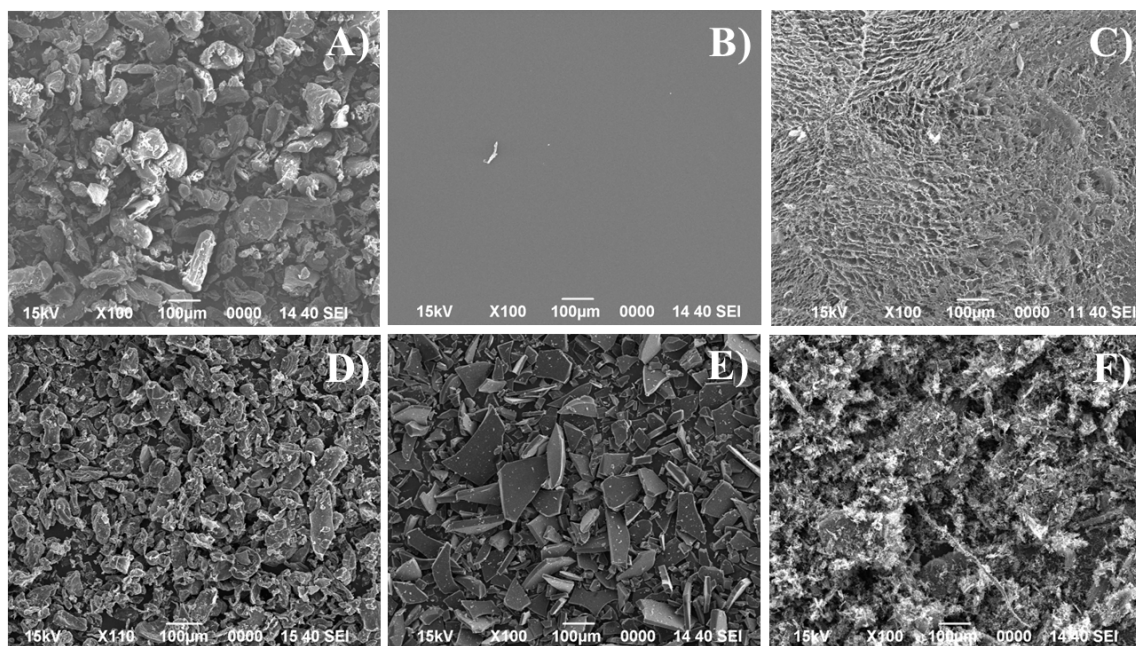

**Figure S2.** SEM images of Chi-P (A), Chi-F (B), Chi-G (C) and their respective samples pyrolyzed at 900 °C: Chi-P-900 (D), Chi-F-900 (E) and Chi-G-900 (F). (Scale: 100 µm).
